# Supplementary material for: Association of Picky Eating with Weight and Height—The European Longitudinal Study of Pregnancy and Childhood (ELSPAC–CZ)
Source: MDPI journal article supplement (doi:10.3390/nu14030444), 2022-01-19
Supplement: s1 [file s1]

**Supplementary table S1** Results of linear models for body weight in kilograms at 15 years with added parental height

|                                    |               | <b>Model 2b</b>            |           |          | <b>Model 3b</b>            |           |          |
|------------------------------------|---------------|----------------------------|-----------|----------|----------------------------|-----------|----------|
|                                    |               | <b>(n=1629*)</b>           |           |          | <b>(n=1629*)</b>           |           |          |
|                                    |               | Adj. R <sup>2</sup> =0.350 |           |          | Adj. R <sup>2</sup> =0.353 |           |          |
| <b>Variable</b>                    |               | <b>β</b>                   | <b>SE</b> | <b>P</b> | <b>β</b>                   | <b>SE</b> | <b>P</b> |
| Picky eater                        | No            | (ref)                      | -         | -        | (ref)                      | -         | -        |
|                                    | Yes           | -2.57                      | 0.620     | <0.001   | -2.62                      | 0.622     | <0.001   |
| Height (cm)                        |               | 0.87                       | 0.040     | <0.001   | 0.88                       | 0.040     | <0.001   |
| Birth weight (kg)                  |               | 1.39                       | 0.506     | 0.006    | 1.50                       | 0.508     | 0.004    |
| Sex                                | Male          | (ref)                      | -         | -        | (ref)                      | -         | -        |
|                                    | Female        | 2.19                       | 0.573     | <0.001   | 2.26                       | 0.575     | <0.001   |
| Maternal height                    |               | -0.12                      | 0.044     | 0.007    | -0.10                      | 0.044     | 0.018    |
| Paternal height                    |               | -0.07                      | 0.038     | 0.068    | -0.07                      | 0.038     | 0.086    |
| Maternal education                 | Elementary    | -                          | -         | -        | (ref)                      | -         | -        |
|                                    | High school   | -                          | -         | -        | -0.67                      | 0.568     | 0.240    |
|                                    | University    | -                          | -         | -        | -1.96                      | 0.634     | 0.002    |
| Family structure                   | Nuclear       | -                          | -         | -        | (ref)                      | -         | -        |
|                                    | Stepfamily    | -                          | -         | -        | -0.61                      | 0.983     | 0.537    |
|                                    | Single-parent | -                          | -         | -        | 1.15                       | 0.836     | 0.171    |
|                                    | Unknown       | -                          | -         | -        | 0.25                       | 0.501     | 0.619    |
| Maternal age at childbirth (years) |               | -                          | -         | -        | -0.00                      | 0.052     | 0.957    |

\*439 observations were deleted due to missing data on parental height

**Supplementary table S2** Results of linear models for height in centimetres at 15 years with added parental height

|                                    |               | <b>Model 2b</b>            |           |          | <b>Model 3b</b>            |           |          |
|------------------------------------|---------------|----------------------------|-----------|----------|----------------------------|-----------|----------|
|                                    |               | <b>(n=1629*)</b>           |           |          | <b>(n=1629*)</b>           |           |          |
|                                    |               | Adj. R <sup>2</sup> =0.543 |           |          | Adj. R <sup>2</sup> =0.545 |           |          |
| <b>Variable</b>                    |               | <b>β</b>                   | <b>SE</b> | <b>P</b> | <b>β</b>                   | <b>SE</b> | <b>P</b> |
| Picky eater                        | No            | (ref)                      | -         | -        | (ref)                      | -         | -        |
|                                    | Yes           | -0.64                      | 0.386     | 0.097    | -0.67                      | 0.387     | 0.083    |
| Birth length (cm)                  |               | 0.62                       | 0.069     | <0.001   | 0.60                       | 0.069     | <0.001   |
| Sex                                | Male          | (ref)                      | -         | -        | (ref)                      | -         | -        |
|                                    | Female        | -8.27                      | 0.292     | <0.001   | -8.33                      | 0.292     | <0.001   |
| Maternal height                    |               | 0.44                       | 0.025     | <0.001   | 0.43                       | 0.025     | <0.001   |
| Paternal height                    |               | 0.34                       | 0.022     | <0.001   | 0.34                       | 0.022     | <0.001   |
| Maternal education                 | Elementary    | -                          | -         | -        | (ref)                      | -         | -        |
|                                    | High school   | -                          | -         | -        | 0.64                       | 0.353     | 0.069    |
|                                    | University    | -                          | -         | -        | 0.53                       | 0.395     | 0.181    |
| Family structure                   | Nuclear       | -                          | -         | -        | (ref)                      | -         | -        |
|                                    | Stepfamily    | -                          | -         | -        | 0.12                       | 0.612     | 0.842    |
|                                    | Single-parent | -                          | -         | -        | -0.18                      | 0.521     | 0.735    |
|                                    | Unknown       | -                          | -         | -        | -0.33                      | 0.312     | 0.292    |
| Maternal age at childbirth (years) |               | -                          | -         | -        | 0.08                       | 0.032     | 0.018    |

**\*439 observations were deleted due to missing data on parental height**
